# Supplementary material for: Smoothened determines β-arrestin–mediated removal of the G protein–coupled receptor Gpr161 from the primary cilium
Source: PubMed Central journal article supplement — J Cell Biol. 2016 Mar 28;212(7):861–75. doi: 10.1083/jcb.201506132 (PMC4810300; doi:10.1083/jcb.201506132), 2016-03-28
Supplement: JCB_201506132_sm.pdf [file JCB_201506132_sm.pdf]

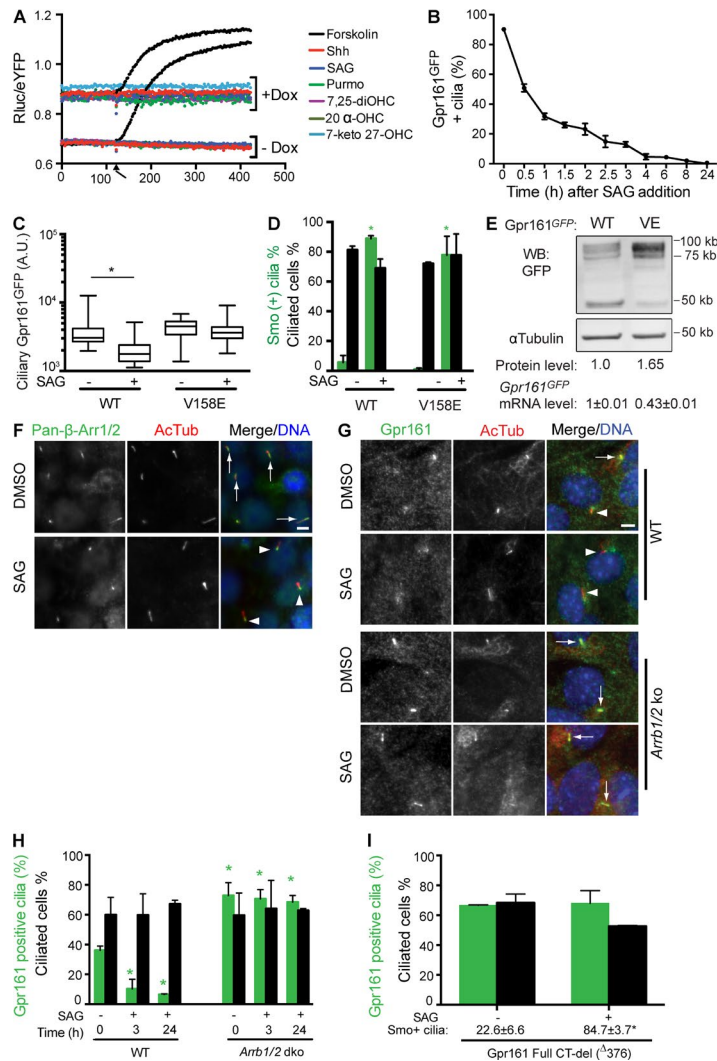

**Figure S1. Ciliary loss of Gpr161 depends on its signaling activity and direct binding to  $\beta$ -arrestins.** (A) Stable T-REx-293 cells expressing CAMYEL (conformation-based cAMP BRET biosensor) and inducibly coexpressing untagged mouse *Gpr161* were treated with 4  $\mu$ g/ml doxycycline (Dox) for 12 h. The media was replaced with assay buffer containing 1 mM IBMX 45 min before the experiment. Readings were taken using 475- and 535-nm emission filters simultaneously after the addition of 5  $\mu$ M coelenterazine-h. After tracking the baseline BRET ratio for 2 min, cells were treated with drugs (10  $\mu$ M each) or 10  $\mu$ M Forskolin using injectors (indicated by arrow). Oxysterols used were as follows: 7-keto-27-hydroxycholesterol, a naturally occurring oxysterol (Myers et al., 2013), 20 $\alpha$ -hydroxycholesterol, a synthetic oxysterol (Nachtergaele et al., 2012), and 7 $\alpha$ ,25-dihydroxycholesterol, which is an agonist for Gpr183 (Hannedouche et al., 2011). The BRET ratios were subsequently quantified for 5 min. Mean values of two independent experiments are represented graphically. (B) Confluent NIH 3T3 Flp-In cells stably expressing GFP-tagged WT *Gpr161* were starved for a total of 24 h and treated with SAG (500 nM) for indicated time periods before fixation. Fixed cells were processed for immunofluorescence with anti-GFP and anti-acetylated tubulin antibodies, for detecting GFP-positive cilia. Data represents mean  $\pm$  SD from two experiments. (C and D) Confluent NIH 3T3 Flp-In cells stably expressing GFP-tagged full-length *Gpr161* V158E mutant (VE) were starved  $\pm$  1  $\mu$ M SAG for 24 h, and Gpr161 (C) and Smo (D) levels in cilia were determined by immunofluorescence. For C, GFP ciliary intensities in cilia were quantified using ImageJ ( $n = 50$  each; \*,  $P < 0.01$ ). For D, data represent mean  $\pm$  SD from three separate fields from one experiment (\*,  $P < 0.001$  with respect to untreated cells in each cell line). (E) Confluent NIH 3T3 Flp-In cells stably expressing indicated constructs were starved for 30 h, and immunoblotted for indicated proteins (Materials and methods). Relative transcript levels for *Gpr161*<sup>GFP</sup> were determined in parallel by qRT-PCR (mean  $\pm$  SD). (F) Confluent IMCD3 Flp-In cells were starved for 24 h and treated with  $\pm$ 250 nM SAG for the last 90 min.  $\beta$ -arrestin localization to cilia is shown after immunofluorescence with anti-pan- $\beta$ -arrestin and acetylated tubulin (AcTub) antibodies. Bar, 5  $\mu$ m. (G and H) Confluent WT and  $\beta$ -arrestin 1/2 double-knockout MEFs (*Arrb1/2* dko) were starved for 48 h, treated with 500 nM SAG for the indicated time points before fixation, and processed for immunofluorescence using anti-Gpr161 and anti-acetylated tubulin antibodies to quantify cilia positive for Gpr161 by microscopy. Data represent mean  $\pm$  SD from three independent experiments. \*,  $P < 0.001$ , with respect to untreated WT cells. (I) Confluent NIH 3T3 Flp-In cells stably expressing GFP-tagged *Gpr161*<sup>Δ376</sup> mutant were starved for 24 h  $\pm$  1  $\mu$ M SAG before fixation, and immunostained using anti-GFP/anti-Smo and anti-acetylated tubulin antibodies. Data represent mean  $\pm$  SD from two independent experiments for Gpr161 IF, and three separate fields from one experiment for Smo IF. \*,  $P < 0.001$  with respect to untreated cells.

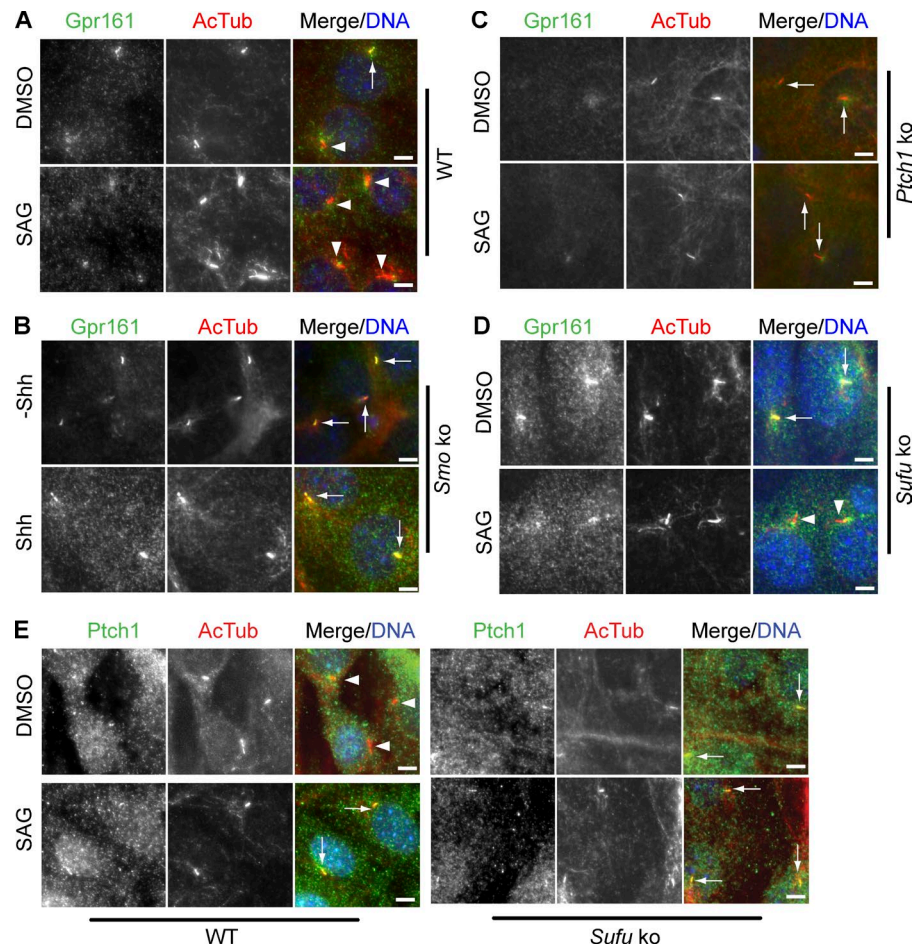

Figure S2. **Steady-state localization of Gpr161 in cilia is not controlled by Shh pathway activity.** (A–D) Confluent WT, *Smo*<sup>-/-</sup>, *Ptch1*<sup>-/-</sup>, or *Sufu*<sup>-/-</sup> MEFs were serum starved for 48 h, treated with 500 nM SAG or 300 ng/ml octyl-Shh for the last 24 h before fixation, and immunostained using anti-Gpr161 (green) and anti-acetylated tubulin (AcTub; red) antibodies. Bar, 5 μm. (E) Confluent WT and *Sufu*<sup>-/-</sup> MEFs were serum starved for 48 h, treated with 500 nM SAG for the last 24 h before fixation, and immunostained using anti-Ptch1 (green) and anti-acetylated tubulin (AcTub; red) antibodies. Bar, 5 μm.

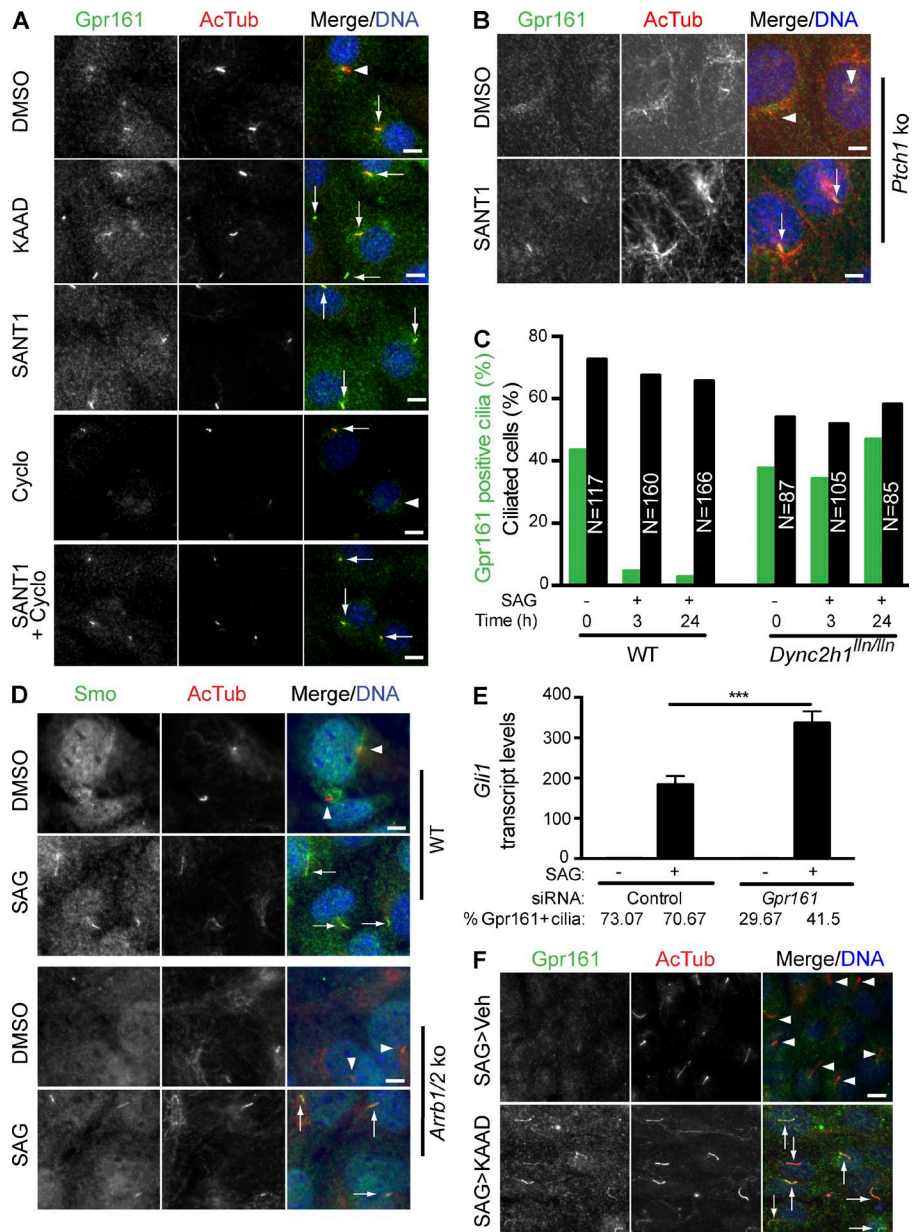

**Figure S3. Presence of activated Smo in cilia determines steady-state levels of Gpr161.** (A) Confluent WT MEFs were serum starved for 48 h, treated with drugs for last 24 h before fixation, and immunostained for Gpr161 (green) and acetylated tubulin (AcTub; red). Drugs used were as follows: 500 nM SAG, 1  $\mu$ M KAAD-cyclopamine (KAAD), 1  $\mu$ M GDC-0449 (GDC), 1  $\mu$ M SANT1, and 5  $\mu$ M cyclopamine (cyclo). Arrows and arrowheads indicate cilia positive and negative for Gpr161, respectively. Bar, 5  $\mu$ m. (B) Confluent *Ptch1*<sup>-/-</sup> MEFs were serum starved for 48 h, treated  $\pm$  1  $\mu$ M SANT1 for the last 24 h before fixation, and immunostained using anti-Gpr161 (green) and anti-acetylated tubulin (AcTub; red) antibodies. Bar, 5  $\mu$ m. (C) Confluent WT and *Dync2h1*<sup>fln/fln</sup> MEFs (Ocbina et al., 2011) were serum starved for 48 h, treated  $\pm$  500 nM SAG for the indicated time periods before fixation, and immunostained using anti-Gpr161 (green) and anti-acetylated tubulin (red) antibodies to quantify Gpr161-positive cilia. N, total counted cilia from one experiment. (D) Confluent WT and  *$\beta$ -arrestin1/2* double-knockout MEFs (*Arrb1/2 ko*) were serum starved for 48 h, treated  $\pm$  1  $\mu$ M SAG in starvation media for 36 h before fixation, and immunostained using anti-Smo (green) and anti-acetylated tubulin (AcTub; red) antibodies. Arrows and arrowheads indicate cilia positive and negative for Smo, respectively. (E)  *$\beta$ -arrestin1/2* double-knockout MEFs were transfected with siRNAs against *Gpr161* (Materials and methods). Confluent cells were starved for 24 h and further treated  $\pm$  1  $\mu$ M SAG for 30 h in starvation media. Total RNA was isolated, and *Gli1* expression levels were determined by quantitative real-time RT-PCR. Percentages of Gpr161-positive cilia upon RNAi suggests partial knockdown of the receptor in the primary MEFs. Data represent mean  $\pm$  SEM from three independent experiments. \*\*\*,  $P < 0.001$ . (F) SAG-pretreated IMCD3 cells  $\pm$  KAAD-cyclopamine, as described in Fig. 3 F, were immunostained to detect ciliary Gpr161 levels. Arrowheads and arrows indicate cilia negative and positive for Gpr161, respectively. Bar, 10  $\mu$ m.



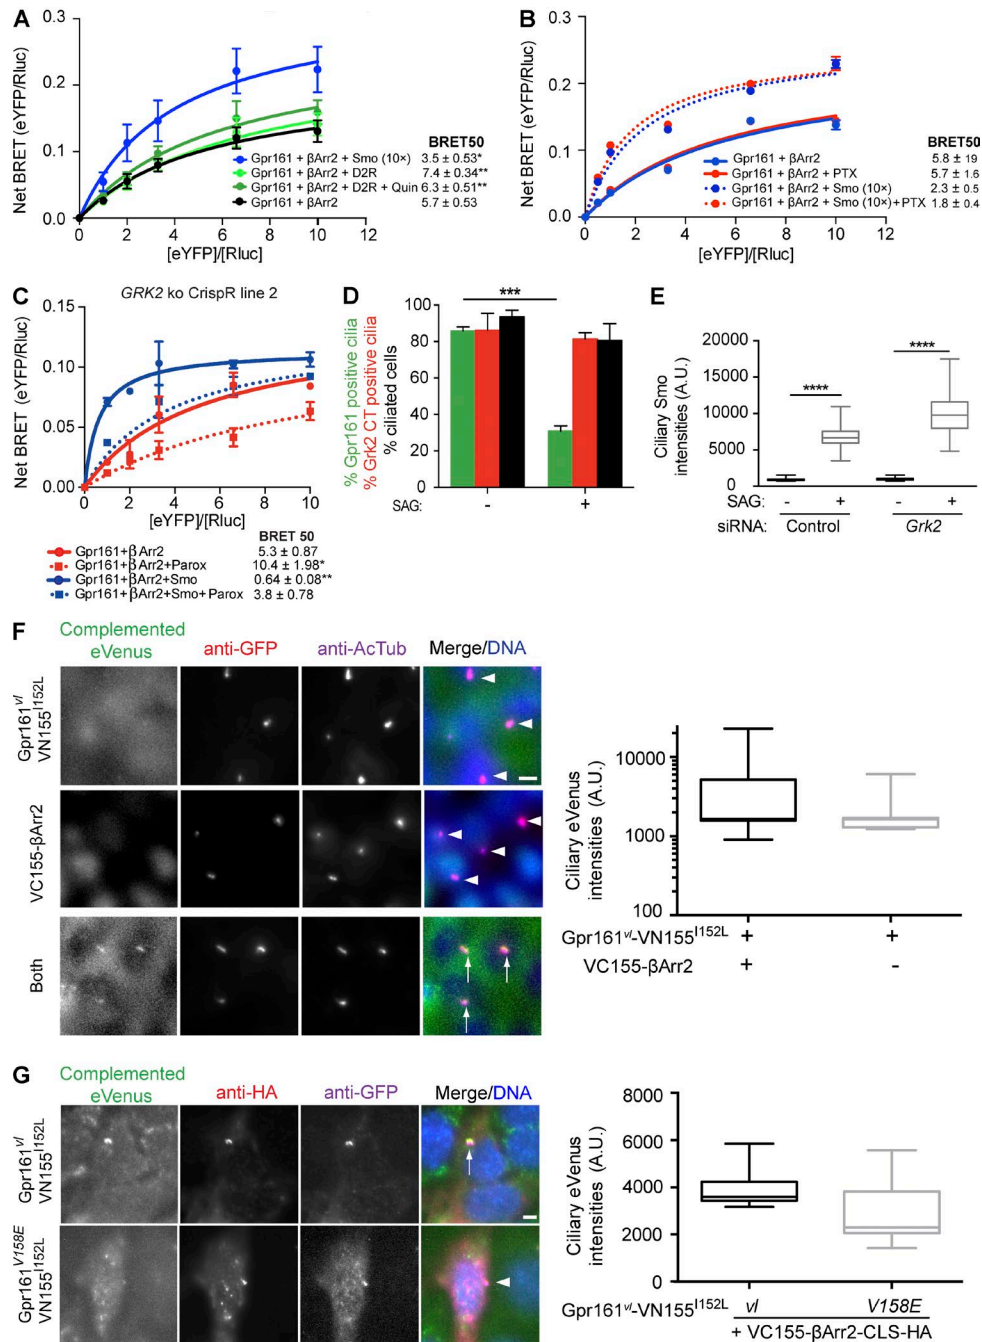

**Figure S4. Smo enhances recruitment of β-Arrestin to Gpr161.** (A and B) T-REx 293 cells were cotransfected with a constant amount of Rluc-β-arrestin1/2 (donor) and increasing amounts of Gpr161-eYFP (acceptor), ±1 μg/well of a six-well plate untagged human Smo (10x), ±1 μg/well of a six-well plate Flag-D2R. Flag-D2R-transfected cells were also finally treated with 1 μM of the D2R agonist quinirole for 20 min (A). The cells were incubated with 800 ng/ml pertussis toxin for 12 h before the BRET assays (B). Cells were subjected to BRET analysis (Materials and methods). The titration curves are mean ± SEM from three independent experiments (A) and mean ± SD from one experiment performed in duplicate (B). \*, P < 0.05; \*\*, P < 0.01 for BRET<sub>50</sub> values with respect to only Gpr161/β-arrestin2 cotransfected cells in A. (C) BRET assays for Gpr161-β-arrestin2 interactions as in Fig. 5 C with GRK2 knockout line 2 from two independent experiments (mean ± SD). \*, P < 0.05; \*\*, P < 0.01 with respect to Rluc-β-arrestin2 binding to Gpr161-eYFP. (D) IMCD3 cells transfected with ciliary-targeted Grk2 C-terminus fusion (CLS-mCherry-Grk2CT; Materials and methods) were starved ±500 nM SAG for 17 h and subjected to immunofluorescence for Gpr161 (green) and anti-acetylated tubulin (magenta). CLS-mCherry-Grk2CT positive (red) cilia were scored for Gpr161. Data represents mean ± SD from two experiments. \*\*\*, P < 0.001. (E) Pixel intensities of Smo in control or *Grk2* siRNA-treated IMCD3 cilia ± SAG treatment represented graphically. n = 100 each; \*\*\*\*, P < 0.0001 with respect to untreated cells in each background. (F) IMCD3 cells with stable expression of Gpr161<sup>vl</sup>-VN155<sup>I152L</sup> were infected ± retroviruses expressing VC155-βArr2. After antibiotic selection, confluent cells were starved for 24 h before fixing and immunostained with anti-GFP (red) anti-acetylated tubulin (AcTub; magenta) antibodies. Intensities of eVenus complementation in the cilia (green channel) of GFP-positive cells (red channel) were quantified using ImageJ and represented graphically (right); n = 21 each. Bar, 5 μm. (G) IMCD3 cells were transfected with the indicated constructs (Materials and methods), starved for 17 h before fixing, and immunostained with anti-HA (red) anti-GFP (magenta) antibodies. Intensities of eVenus complementation in the cilia (green channel) of HA/GFP-positive cells were quantified using ImageJ and represented graphically (right); n ≥ 22 each. Bar, 5 μm. P < 0.001 between groups. Arrows and arrowheads indicate cilia positive and negative for eVenus complementation, respectively (F and G).

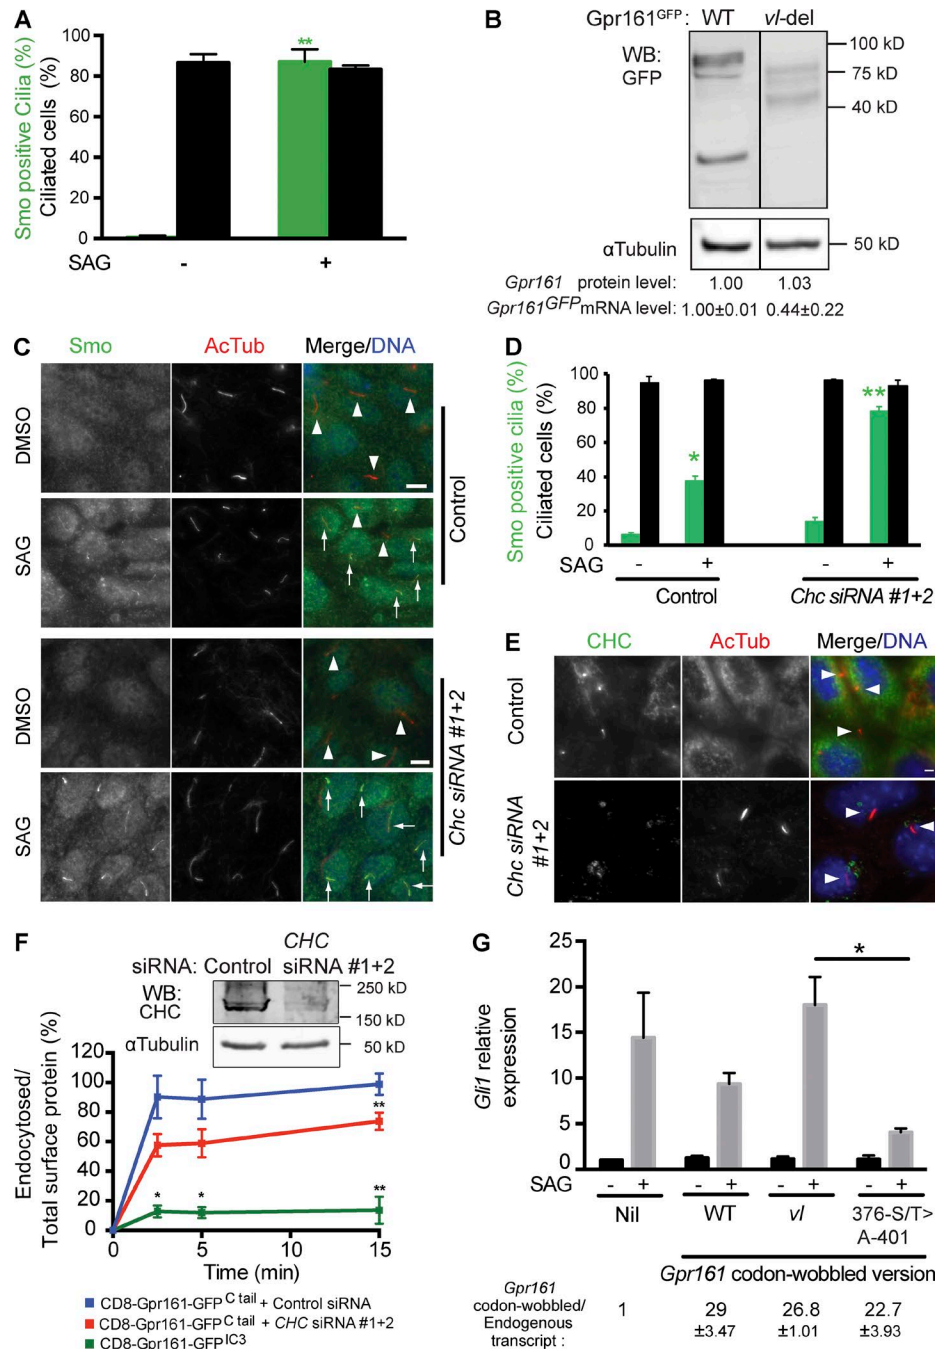

Figure S5. **Disappearance of Gpr161 from cilia is dependent on clathrin-mediated endocytosis.** (A) Confluent NIH 3T3 Flp-In cells stably expressing GFP-tagged *Gpr161<sup>vl</sup>* mutant were treated  $\pm 1 \mu\text{M}$  SAG for 24 h in starvation media before fixation, and Smo levels were quantified by immunofluorescence. Data represent mean  $\pm$  SD from three separate fields from one experiment. \*\*,  $P < 0.01$  with respect to untreated cells. (B) Confluent NIH 3T3 Flp-In cells stably transfected with indicated constructs were starved for 30 h and immunoblotted for indicated proteins (Materials and methods). Relative transcript levels for *Gpr161<sup>GFP</sup>* were determined in parallel by quantitative real-time RT-PCR (mean  $\pm$  SD). (C and D) IMCD3 Flp-In cells were transfected with predesigned On-target Plus siRNAs against clathrin heavy chain (*Chc*) for 72 h. Confluent cells were starved for 30 h, treated  $\pm 250 \text{ nM}$  SAG for 5 h before fixing, and immunostained using anti-Smo (green) and anti-acetylated tubulin (AcTub; red) antibodies to quantify cilia positive for Smo. Arrows and arrowheads indicate cilia positive and negative for Smo, respectively. Bar, 10  $\mu\text{m}$ . Data represent mean  $\pm$  SD from three separate fields from one experiment. \*,  $P < 0.001$ ; \*\*,  $P < 0.0001$  with respect to DMSO-treated cells in each case. (E) IMCD3 Flp-In cells transfected with indicated predesigned siRNAs for 72 h were starved for the last 24 h, fixed, and immunostained for CHC. *Chc* siRNA-treated cells show specificity of the anti-CHC antibody. Arrowheads denote cilia. Bar, 5  $\mu\text{m}$ . (F) ARPE-19 cells reverse transfected with siRNAs against *CHC* were transfected with plasmids expressing CD8 $\alpha$ -tagged with Gpr161 C tail or third intracellular loop (IC3) fragments (Materials and methods) the next day. Cells were subjected to ELISA (Materials and methods). Endocytosed CD8 $\alpha$  fusion proteins were expressed as a percentage of surface CD8 fusions. Inset shows immunoblot for *CHC*. Data represent mean  $\pm$  SEM from three experiments. \*,  $P < 0.05$ ; \*\*,  $P < 0.01$  with respect to control siRNA-treated cells at respective time points. (G) Confluent NIH 3T3 cells stably expressing untagged codon-wobbled wild type or mutant *Gpr161* (Materials and methods) were treated  $\pm$ SAG in starvation media for 30 h, followed by RNA isolation and quantification of *Gli1* levels by quantitative real-time RT-PCR. Data represent mean  $\pm$  SEM from three separate stable lines in each background and one to four independent experiments for each line. Quantitative real-time RT-PCR confirmed *Gpr161* overexpression to be identical between the respective lines (Materials and methods). \*,  $P < 0.05$ .

## References

- Hannedouche, S., J. Zhang, T. Yi, W. Shen, D. Nguyen, J.P. Pereira, D. Guerini, B.U. Baumgarten, S. Roggo, B. Wen, et al.. 2011. Oxysterols direct immune cell migration via EBI2. *Nature*. 475:524–527. <http://dx.doi.org/10.1038/nature10280>
- Myers, B.R., N. Sever, Y.C. Chong, J. Kim, J.D. Belani, S. Rychnovsky, J.F. Bazan, and P.A. Beachy. 2013. Hedgehog pathway modulation by multiple lipid binding sites on the smoothed effector of signal response. *Dev. Cell*. 26:346–357. <http://dx.doi.org/10.1016/j.devcel.2013.07.015>
- Nachtergaele, S., L.K. Mydock, K. Krishnan, J. Rammohan, P.H. Schlesinger, D.F. Covey, and R. Rohatgi. 2012. Oxysterols are allosteric activators of the oncoprotein Smoothed. *Nat. Chem. Biol.* 8:211–220. <http://dx.doi.org/10.1038/nchembio.765>
- Ocbina, P.J., J.T. Eggenschwiler, I. Moskowitz, and K.V. Anderson. 2011. Complex interactions between genes controlling trafficking in primary cilia. *Nat. Genet.* 43:547–553. <http://dx.doi.org/10.1038/ng.832>
